# Supplementary material for: ﻿Advances in Legume Systematics 14. Classification of Caesalpinioideae. Part 2: Higher-level classification
Source: PubMed Central journal article supplement (PMC11188994; doi:10.3897/phytokeys.240.101716), 2024-04-03

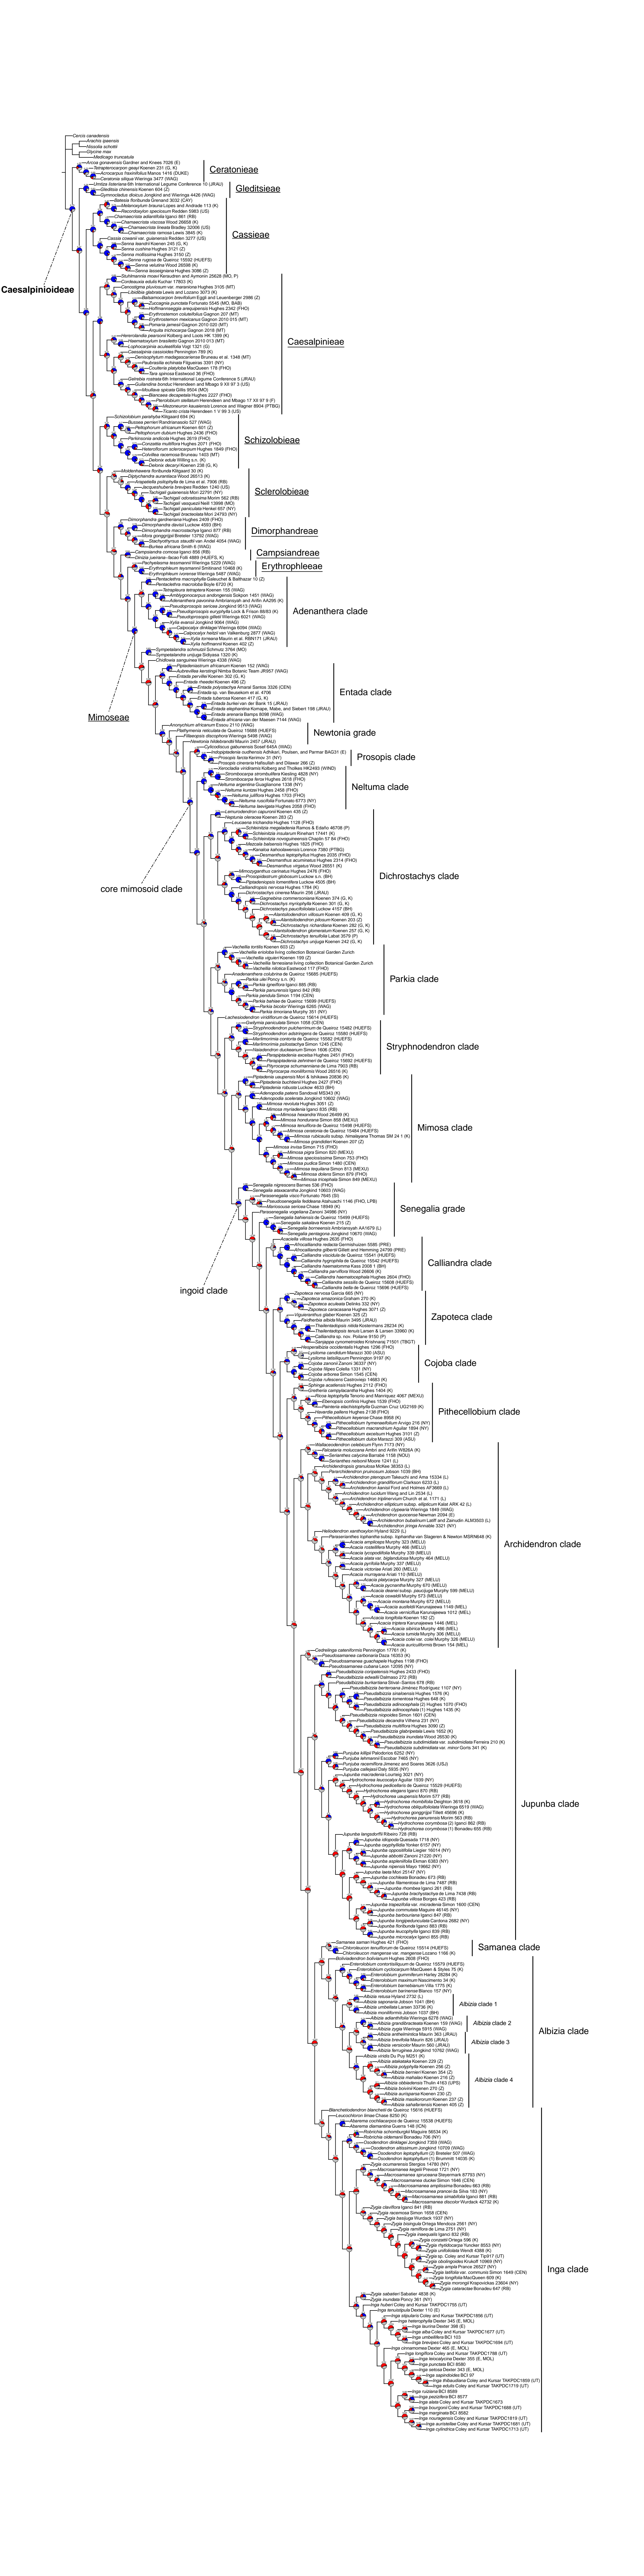

Supplement: phytokeys-240-001_article-101716__-s003.pdf [file phytokeys-240-001_article-101716__-s003.pdf]
